# Supplementary material
Source: HighWire-hosted journal article supplement (http://thorax.bmjjournals.com/highwire/filestream/174146/field_highwire_adjunct_files/0/Thorax_Appendix_200324.pdf)
Supplement: Thorax_Appendix_200324.pdf [file Thorax_Appendix_200324.pdf]

**Coarse and fine, but not ultrafine particles in urban air trigger asthma  
hospitalization in children.**

Amne Iskandar<sup>1</sup>, Zorana Jovanovic Andersen<sup>2</sup>, Klaus Bønnelykke<sup>1</sup>, Thomas Ellermann<sup>3</sup>, Klaus  
Kaae Andersen<sup>2</sup> Hans Bisgaard<sup>1</sup>

<sup>1</sup>Copenhagen Prospective Studies on Asthma in Childhood, Health Sciences, University of  
Copenhagen, & Copenhagen University Hospital, Gentofte, Copenhagen, Denmark; <sup>2</sup>Institute of  
Cancer Epidemiology, Danish Cancer Society, Copenhagen, Denmark; <sup>3</sup>National Environmental  
Research Institute, Aarhus University, Roskilde, Denmark.

**Correspondence Author:** Hans Bisgaard, Copenhagen Prospective Studies on Asthma in  
Childhood, Health Sciences, University of Copenhagen, Copenhagen University Hospital,  
Ledreborg Allé 34, 2820 Gentofte, Denmark. Telephone: +4533777360; Fax: +4535257731; E-  
mail: [bisgaard@copsac.com](mailto:bisgaard@copsac.com).

**Table E1.** Correlation matrix showing the mutual correlations between pollutants and meteorological conditions during May 2001 to December 2008. DP is dew point, WS is wind speed and GR is global radiation.

| <b>Correlation</b> | NO <sub>x</sub> | NO <sub>2</sub> | PM <sub>10</sub> | PM <sub>2.5</sub> | UFPs | DP    | WS    | GR    |
|--------------------|-----------------|-----------------|------------------|-------------------|------|-------|-------|-------|
| NO <sub>x</sub>    | 1               | 0.93            | 0.37             | 0.28              | 0.45 | -0.14 | -0.47 | -0.22 |
| NO <sub>2</sub>    |                 | 1               | 0.43             | 0.33              | 0.51 | -0.13 | -0.50 | -0.20 |
| PM <sub>10</sub>   |                 |                 | 1                | 0.85              | 0.40 | 0.11  | -0.18 | 0.01  |
| PM <sub>2.5</sub>  |                 |                 |                  | 1                 | 0.26 | -0.02 | -0.16 | -0.05 |
| UFPs               |                 |                 |                  |                   | 1    | -0.01 | -0.38 | 0.16  |
| DP                 |                 |                 |                  |                   |      | 1     | -0.13 | 0.43  |
| WS                 |                 |                 |                  |                   |      |       | 1     | -0.25 |
| GR                 |                 |                 |                  |                   |      |       |       | 1     |

**Table E2.** The yearly distribution of air pollution levels and meteorological conditions in urban background in Copenhagen during May 2001 to December 2008

|                   | 2001             | 2002             | 2003             | <u>Mean (SD)</u><br>2004 | 2005             | 2006             | 2007             | 2008             |
|-------------------|------------------|------------------|------------------|--------------------------|------------------|------------------|------------------|------------------|
| NO <sub>x</sub>   | 14.85(8.89)      | 13.58(8.06)      | 15.66(9.21)      | 14.88(7.84)              | 14.9(8.05)       | 15.87(7.89)      | 13.05(7.6)       | 12.98(6.68)      |
| NO <sub>2</sub>   | 11.33(4.6)       | 10.63(4.95)      | 12.27(5.66)      | 11.51(4.87)              | 11.72(5.07)      | 12.83(4.99)      | 10.01(4.35)      | 10.34(4.28)      |
| PM <sub>10</sub>  | 24.85(13.03)     | 30.06(15.95)     | 30.5(16.11)      | 24(9.46)                 | 25.69(12.02)     | 27.16(12.05)     | 24.18(10.7)      | 21.36(8.44)      |
| PM <sub>2.5</sub> |                  |                  | 10.14(4.57)      | 9.71(4.48)               | 10.73(6.09)      | 11.7(6.53)       | 10.06(5.48)      | 9.54(3.96)       |
| UFP               | 8743.27(3244.44) | 7600.48(3044.97) | 9739.51(4763.64) | 7358.38(2817.19)         | 5805.36(2992.58) | 5071.17(2052.06) | 5703.79(2588.12) | 4741.38(2186.88) |
| Dew point         | 7.87(5.74)       | 5.43(6.16)       | 4.52(6.6)        | 4.72(5.87)               | 4.65(6.18)       | 5.46(6.61)       | 5.3(5.26)        | 4.27(4.88)       |
| Wind speed        | 3.98(1.35)       | 4.15(1.43)       | 4.06(1.44)       | 4.18(1.43)               | 4.07(1.55)       | 3.92(1.3)        | 4.27(1.6)        | 4.35(1.69)       |
| Global radiation  | 132.88(103.23)   | 119.16(98.7)     | 117.83(95.89)    | 113.93(92.72)            | 119.92(94.96)    | 116.62(101.73)   | 111.05(93.62)    | 108.05(100.88)   |

**Table E3.** The change in the rate of hospitalizations for asthma among children, in the city of Copenhagen, with an interquartile range (IQR) increase in pollutant levels, adjusted for dew point and global radiation.

| Air pollutant     | n    | OR (95 % CI)     | p-value |
|-------------------|------|------------------|---------|
| NO <sub>x</sub>   | 8208 | 1.07 (1.03-1.11) | <0.01   |
| NO <sub>2</sub>   | 8208 | 1.07 (1.02-1.11) | <0.01   |
| PM <sub>10</sub>  | 8208 | 1.07 (1.03-1.11) | <0.01   |
| PM <sub>2.5</sub> | 6329 | 1.08 (1.04-1.13) | <0.01   |
| UFPs              | 7004 | 1.06 (0.99-1.13) | 0.09    |

**Table E4.** Results from generalized additive models using moving average of 5 days. The change in the rate of hospitalizations for asthma among children, in the city of Copenhagen, with an interquartile range (IQR) increase in pollutant levels, adjusted for dew point, global, day of the week and time trend.

| Air pollutant     | n    | OR (95 % CI)     | p-value |
|-------------------|------|------------------|---------|
| NO <sub>x</sub>   | 7893 | 1.10 (1.05-1.16) | <0.01   |
| NO <sub>2</sub>   | 7893 | 1.10 (1.04-1.16) | <0.01   |
| PM <sub>10</sub>  | 7720 | 1.08 (1.03-1.12) | <0.01   |
| PM <sub>2.5</sub> | 5949 | 1.08 (1.03-1.12) | <0.01   |
| UFPs              | 5938 | 1.04 (0.98-1.10) | 0.25    |
